# Supplementary material
Source: MDPI journal article supplement (https://www.mdpi.com/2073-4441/16/2/318)
Supplement: s1 [file s1]

## Supplementary Materials

**Table S1.** Sequences of primers and probes.

| Assay | Targeted gene                | Primer sets                                                                                                                                       | Ref.                               |
|-------|------------------------------|---------------------------------------------------------------------------------------------------------------------------------------------------|------------------------------------|
| 1     | N gene of SARS-CoV-2         | 2019-nCoV_N2-F: 5'-TTACAAACATTGGCCGCAAA-3'<br>2019-nCoV_N2-R: 5'-GCGCGACATTCCGAAGAA-3'<br>2019-nCoV_N2-P: 5'-JUN-ACAATTTGCCCCAGCGCTTCAG-MGBNFQ-3' | [7,8, and the references there in] |
|       | HRP3 gene fragment of AQHRPa | HRP3_F: 5'-AGATTTGGACCTGCGAGCG-3'<br>HRP3_R: 5'-GAGCGGCTGTCTCCACAAGT-3'<br>HRP3_P: 5'-6FAM-TTCTGACCTGAAGGCTCTGCGCG-MGBNFQ-3'                      | [7,8]                              |
| 2     | IPC <sup>b</sup>             | IPC_F: 5'-ACGCACATATACGGGTAGCA<br>IPC-R: 5'-TCCCGCCTATAGACCACCTT<br>IPC-Probe: 5'-VIC-ACTTTCGGATGCATCTAGTGACA-MGBNFQ-3'                           | [7,8]                              |

<sup>a</sup> Whole processing spike control, Armored RNA Quant RNase P standard (AQHRP)

<sup>b</sup> Inhibition assessment, internal RT-qPCR positive control (IPC) **Table S2.** Recipe, quantitative RNA standard, range of standard curve, and settings for threshold and baseline of RT-qPCR assays.

| Recipe of RT-qPCR assays   |                                                                   |                                        |            |                                                                  |                                                                |                        |                       |
|----------------------------|-------------------------------------------------------------------|----------------------------------------|------------|------------------------------------------------------------------|----------------------------------------------------------------|------------------------|-----------------------|
| Assays                     | Component                                                         | Amount (volume) per 10-<br>μL reaction | Assay/Test | Quantitative RNA standard                                        | Range of standard curve (gc/reaction)                          | Settings for threshold | Settings for baseline |
| N2                         |                                                                   |                                        | N2         | Quantitative Synthetic SARSCoV2 RNA (ATCC, USA)                  | 9.25E4, 9.25E3, 9.25E2, 9.25E1, 9.25E0, 5.29E0, 3.02E0, 1.73E0 | 0.04                   | auto                  |
|                            | 4X TaqPath™ 1-Step Master Mix (Thermo Fisher Scientific, CA, USA) | 2.5 μL                                 |            |                                                                  |                                                                |                        |                       |
|                            |                                                                   | 180 nM                                 |            |                                                                  |                                                                |                        |                       |
|                            | Forward primer                                                    | 180 nM                                 | *PMMoV     | Synthetic RNA (IDT, USA)                                         | 5.00E8, 5.00E7, 5.00E6, 5.00E5, 5.00E4, 5.00E3, 5.00E2, 5.00E1 | 0.04                   | auto                  |
|                            | Reverse primer                                                    | 150 nM                                 |            |                                                                  |                                                                |                        |                       |
|                            | Probe                                                             | 2.5~ 5 μL                              |            |                                                                  |                                                                |                        |                       |
|                            | RNA/Blank controls/Standards                                      |                                        | AQHRP      | Extracted RNA from Armored RNA Quant RNase P (Asuragen, TX, USA) | 2.50E4, 2.50E3, 2.50E2, 2.50E1, 6.25E0, 3.13E0, 1.56E0         | 0.04                   | auto                  |
| *FRNAPH-II, AQHRP (Duplex) | TaqPath™ 1-Step Master Mix (4X)                                   | 2.5 μL                                 | *FRNAPH-II | N.A.                                                             | N.A.                                                           | 0.02                   | auto                  |
|                            | HRP3-F                                                            | 180 nM                                 |            |                                                                  |                                                                |                        |                       |
|                            | HRP3-R                                                            | 180 nM                                 |            |                                                                  |                                                                |                        |                       |
|                            | HRP3-P VTB4-FphGIIf                                               | 150 nM                                 |            |                                                                  |                                                                |                        |                       |
|                            | VTB4-FphGIIf                                                      | 60 nM                                  |            |                                                                  |                                                                |                        |                       |
|                            | VTB4-FphGIIf                                                      | 60 nM                                  |            |                                                                  |                                                                |                        |                       |
|                            | VTB4-FphGIIf                                                      | 50 nM                                  |            |                                                                  |                                                                |                        |                       |
|                            | FphGIIf probe                                                     | 2.5 ~ 5 μL                             |            |                                                                  |                                                                |                        |                       |
|                            | RNA/Blank controls/Standards                                      |                                        |            |                                                                  |                                                                |                        |                       |

\*Included for quality control and quality assurance

**Table S3.** Performance of TaqMan RT-qPCR Assays.

| Test         | Assay | VOC | LOD<br>(gc/reaction) | Y-intercept (mean<br>±SD) | Slope (mean±<br>SD) | R2 (mean±<br>SD) | Efficiency (mean<br>±SD) |
|--------------|-------|-----|----------------------|---------------------------|---------------------|------------------|--------------------------|
| SARS-CoV-2 N | N2    |     | 1.210                | 33.362 ± 0.660            | -3.450 ± 0.103      | 0.994 ± 0.002    | 99.223 ± 4.301           |
| AQHRP        | HRP3  |     | 1.563                | 34.057 ± 0.927            | -3.314 ± 0.167      | 0.990 ± 0.007    | 100.802 ± 6.771          |

$$\text{Gene copies / 100 mL} = \frac{\text{RNA concentration X RNA dilution volume}}{\text{Processed wastewater volume X 100 mL}} \cdot \text{----}$$

-- S1 Whole-genome sequencing of wastewater

Whole-genome sequencing (WGS) of wastewater samples was performed at the Division of Enteric Diseases, National Microbiology Laboratory, Public Health Agency of Canada (Winnipeg, MB, Canada). Briefly, after RNA extraction, the cDNA was synthesized using the SuperScript IV First-Strand Synthesis System (Invitrogen, USA). Tiled amplicons were amplified according to the ARTICv4.1 protocol. Tiled amplicons were sequenced with MiSeq 300PE V3 chemistry (Illumina, USA). Mutations were identified on mapping files generated using SAMtools v 1.7 against a SARS-CoV-2 reference sequence (MN908947.3) [8]. SARS-CoV-2 lineage was assigned based on coverage of consensus mutations following the Pango Nomenclature proposal [8].

**Table S4.** Distribution of Omicron sub-variants in Saskatoon between January and September 2022.

| Date Collected | % Breadth of coverage (≥ 5x depth) | Average depth of coverage | Median depth of coverage | VOC (consensus) | Number of VOC mutations (consensus) | Average Frequency of reads (cov > 30) with VOC mutations (consensus) | B.1.1.529 (Omicron parent) | Pango lineage (consensus)/sublineage detected | Sub-consensus                                                                                                                                                         |
|----------------|------------------------------------|---------------------------|--------------------------|-----------------|-------------------------------------|----------------------------------------------------------------------|----------------------------|-----------------------------------------------|-----------------------------------------------------------------------------------------------------------------------------------------------------------------------|
| 9/12/2022      | 97.68                              | 4744.51                   | 1198                     | BA.5.2          | 36 / 38                             | 0.88                                                                 | 30 (0.91)                  | BA.5.2                                        | High presence of BA.5<br>Moderate presence of BA.4<br>Detection of mutations defining BA.5.1, BA.5.2 and BA.5.2.1                                                     |
| 9/4/2022       | 99.36                              | 15284.68                  | 13304                    | BA.5.2.1        | 36 / 38                             | 0.92                                                                 | 29 (0.91)                  | BA.5.2.1                                      | High presence of BA.5<br>Detection of mutations defining BA.5.2 and BA.5.2.1                                                                                          |
| 8/28/2022      | 98.11                              | 10402.34                  | 6659                     | BA.5.2.1        | 37 / 38                             | 0.92                                                                 | 30 (0.91)                  | BA.5.2.1                                      | High presence of BA.5<br>Detection of mutations defining BA.5.1, BA.5.2 and BA.5.2.1                                                                                  |
| 8/21/2022      | 98.56                              | 7493.1                    | 3813                     | BA.5.2.1        | 36 / 38                             | 0.89                                                                 | 29 (0.89)                  | BA.5.2.1                                      | High presence of BA.5<br>Moderate presence of BA.4<br>Detection of mutations defining BA.5.1, BA.5.2, BA.5.2.1                                                        |
| 8/14/2022      | 99.44                              | 15792.56                  | 8023                     | BA.5.2          | 37 / 38                             | 0.92                                                                 | 30 (0.93)                  | BA.5.2                                        | High presence of BA.5<br>Moderate presence of BA.4<br>Detection of mutations defining BA.5.1, BA.5.2 and BA.5.2.1                                                     |
| 8/7/2022       | 98.94                              | 17826.29                  | 12224                    | BA.5.2          | 37 / 38                             | 0.92                                                                 | 30 (0.93)                  | BA.5.2                                        | High presence of BA.5<br>Moderate presence of BA.4<br>Trace presence of 2 BA.2.12.1-defining mutations<br>Detection of mutations defining BA.5.1, BA.5.2 and BA.5.2.1 |
| 8/3/2022       | 99.42                              | 7700.76                   | 4204                     | BA.5.2.1        | 37 / 38                             | 0.93                                                                 | 30 (0.93)                  | BA.5.2.1                                      | High presence of BA.5<br>Moderate presence of BA.4<br>Detection of mutations defining BA.5.1, BA.5.2 and BA.5.2.1                                                     |
| 7/24/2022      | 98.06                              | 7806.52                   | 4237                     | BA.5.2.1        | 34 / 38                             | 0.83                                                                 | 28 (0.84)                  | BA.5.2.1                                      | High presence of BA.5<br>Detection of mutations defining BA.5.2, BA.5.2.1                                                                                             |
| 7/17/2022      | 98.09                              | 10472.77                  | 5479                     | BA.5            | 36 / 38                             | 0.87                                                                 | 30 (0.91)                  | BA.5                                          | Low presence of BA.2.12.1<br>Moderate presence of BA.4 and BA.5<br>Detection of mutations defining BA.5.1, BA.5.2/BA.5.2.1                                            |

|           |       |          |                       |                          |      |               |           |                                                                                                                                            |
|-----------|-------|----------|-----------------------|--------------------------|------|---------------|-----------|--------------------------------------------------------------------------------------------------------------------------------------------|
| 7/10/2022 | 93.54 | 13102.82 | 228<br>(Omicron 7088) | 37 / 38                  | 0.89 | 30<br>(0.91)  | Ambiguous | Moderate presence of BA.4<br>High presence of BA.5<br>Detection of mutations defining BA.5.1.1, BA.5.2/BA.5.2.1 and BA.5.5                 |
| 7/3/2022  | 98.52 | 10978.16 | 6523                  | BA.5 38 / 38             | 0.88 | 31<br>(0.95)  | BA.5      | Moderate presence of BA.2.12.1, BA.4 and BA.5<br>Detection of mutations defining BA.5.1, BA.5.2 and BA.5.5                                 |
| 6/26/2022 | 97.72 | 8026.26  | 5574                  | BA.2 59 / 60             | 0.93 | 31<br>(0.96)  | BA.2      | Moderate presence of BA.4, BA.5 and BA.2.12.1<br>Detection of mutations defining BA.2.3, BA.4.1 and BA.5.2                                 |
| 6/19/2022 | 99.45 | 14759.13 | 9862                  | BA.2.12.1 59 / 60        | 0.96 | 31<br>(0.99)  | BA.2.12.1 | Trace the presence of BA.4<br>Low presence of BA.5<br>Moderate presence of BA.2.12.1<br>Detection of mutations defining BA.2.36 and BA.5.3 |
| 6/12/2022 | 98.63 | 10305.25 | 7217                  | BA.2.12.1 59 / 60        | 0.97 | 31<br>(0.99)  | BA.2.12.1 | High presence of BA.2.12.1<br>Trace presence of 3 BA.5 mutations                                                                           |
| 6/5/2022  | 98.92 | 11634.66 | 7107                  | BA.2 59 / 60             | 0.98 | 31<br>(0.995) | BA.2      | Moderate presence of BA.2.12.1<br>Trace presence of 2 BA.5 mutations                                                                       |
| 5/29/2022 | 95.9  | 9426.08  | 5640                  | BA.2.3 57 / 60           | 0.94 | 30<br>(0.96)  | BA.2.3    | Moderate presence of BA.2.12.1<br>Detection of a mutation defining BA.2.3                                                                  |
| 5/22/2022 | 98.78 | 25415.08 | 17506                 | BA.2.12 59 / 60          | 0.97 | 31<br>(0.989) | BA.2.12   | Moderate presence of BA.2.12.1<br>Detection of mutations defining BA.2.3                                                                   |
| 5/8/2022  | 98.75 | 12909.68 | 9673                  | BA.2 59 / 60             | 0.98 | 31<br>(0.997) | BA.2      | Moderate presence of BA.2.12.1<br>Detection of a mutation defining BA.2.3                                                                  |
| 5/1/2022  | 97.83 | 8248.56  | 6152                  | BA.2 59 / 60             | 0.97 | 31<br>(0.996) | BA.2      | Low presence of BA.2.12.1<br>Detection of mutations defining BA.2.3                                                                        |
| 4/22/2022 | 99.57 | 13648.27 | 9627                  | BA.2 59 / 60             | 0.98 | 31<br>(0.997) | BA.2      | Trace the presence of BA.1<br>Detection of BA.2.12 mutations<br>Detection of BA.2.3 mutations                                              |
| 5/15/2022 | 98.51 | 11016.26 | 4375                  | BA.2 59 / 60             | 0.97 | 31<br>(0.987) | BA.2      | Trace the presence of BA.1<br>Moderate presence of BA.2.12.1<br>Detection of a mutation defining BA.2.3                                    |
| 4/13/2022 | 99.4  | 19083.36 | 12257                 | BA.2.3 59 / 60           | 0.95 |               | BA.2.3    | Trace the presence of BA.1<br>Detection of BA.2.9 mutation<br>Detection of BA.2.12/BA.2.12.1 mutations                                     |
| 4/6/2022  | 98.5  | 11074.71 | 5769                  | BA.2 57/60               | 0.92 | 30<br>(0.97)  | BA.2      | Trace the presence of BA.1<br>Detection of BA.2.3 mutation                                                                                 |
| 3/20/2022 | 96.63 | 6949.01  | 2404                  | BA.2.3 54 / 60           | 0.78 |               | BA.2.3    | Low presence of BA.1                                                                                                                       |
| 3/5/2022  | 98.01 | 10506.81 | 5116                  | BA.1 48 / 51             | 0.76 |               | BA.1      | Moderate presence of BA.2                                                                                                                  |
| 2/28/2022 | 95.29 | 8057.34  | 1501                  | BA.1.1 (Omicron 38 / 51) | 0.68 |               | BA.1.1    | Moderate presence of BA.2                                                                                                                  |
| 2/23/2022 | 97.75 | 16031.41 | 5241                  | BA.1 (Omicron 43 / 51)   | 0.74 |               | BA.1      | Moderate presence of BA.2 (Omicron)                                                                                                        |
| 2/6/2022  | 97.6  | 11214.41 | 2982                  | BA.1 (Omicron 48 / 51)   | 0.88 |               | BA.1      | Low presence of BA.2<br>Trace the presence of Delta                                                                                        |
| 1/30/2022 | 98.41 | 9983.54  | 4365                  | BA.1.1 (Omicron 50/51)   | 0.95 |               | BA.1.1    | Trace the presence of BA.2                                                                                                                 |
| 1/23/2022 | 98.65 | 19700.52 | 10172                 | BA.1 (Omicron 51 / 51)   | 0.94 |               | BA.1      | Low presence of BA.2<br>Trace the presence of Delta                                                                                        |
| 1/23/2022 | 98.65 | 98.65    | 98.65                 | BA.1 (Omicron 51/51)     | 0.94 |               | BA.1      | Low presence of BA.2<br>Trace the presence of Delta                                                                                        |
| 1/9/2022  | 99.29 | 14499.08 | 5575                  | BA.1 (Omicron 51/51)     | 0.96 |               | BA.1      | Trace the presence of 4 Delta mutations                                                                                                    |
| 1/2/2022  | 99.57 | 13755.92 | 5132                  | BA.1 (Omicron 48/51)     | 0.64 |               | BA.1      | Moderate presence of 3 BA.2 mutations<br>Low presence of Delta (AY.25/AY.25.1)                                                             |

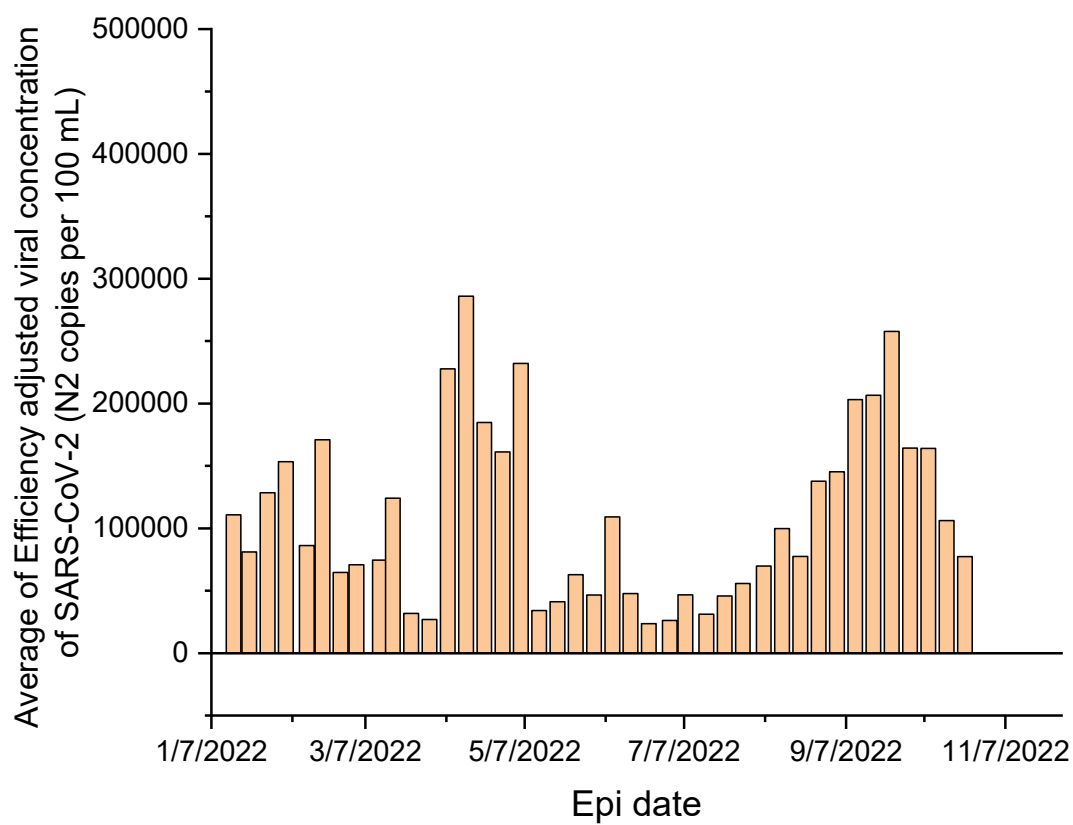

**Figure S1.** Trend of wastewater SARS-COV-2 RNA between January and September 2022
